# Supplementary material for: Assessing the therapeutic impact of resveratrol in ALS SOD1-G93A mice with electrical impedance myography
Source: Front Neurol. 2022 Dec 22;13:1059743. doi: 10.3389/fneur.2022.1059743 (PMC9813785; doi:10.3389/fneur.2022.1059743)
Supplement: Supplementary file 1 [file Table_1.XLSX]

## Sheet: Fig 1 Disease Onset
Diseases Onset Female				Disease Onset Male				Disease Onset Female + Male
Female RSV	Female NC			Male RSV	Male NC			Female + Male RSV	Female + Male NC
105	112			105	105			105	112
112	112			105	105			112	112
112	112			105	105			112	112
112	112			105	105			112	112
112	115			105	105			112	115
112	115			112	105			112	115
115	115			112	112			115	115
116	123			112	112			116	123
123	143*			112	126			123	143*
				119	133
								105	105
								105	105
								105	105
NOTE: * This mouse (6143904) turned out to be WT so it was removed from the analysis								105	105
								105	105
								112	105
								112	112
								112	112
								112	126
								119	133
Disease Onset Female				Disease Onset Male				Disease Onset Female + Male
day	F rsv	F nc		day	M rsv	M nc		day	F+M rsv	F+M nc
105	1			105	1			105	1
112	1	1		105	1			112	1	1
112	1	1		105	1			112	1	1
112	1	1		105	1			112	1	1
112	1	1		105	1			112	1	1
112	1			105		1		112	1
115	1	1		105		1		115	1	1
115		1		105		1		115		1
115		1		105		1		115		1
116	1			105		1		116	1
123		1		105		1		123		1
133	1			112	1	1		133	1
143		1*		112	1	1		143		1*
				112	1
				112	1			105	1
				119	1			105	1
				126		1		105	1
				133		1		105	1
								105	1
								105		1
								105		1
								105		1
								105		1
								105		1
								105		1
								112	1	1
								112	1	1
								112	1
								112	1
								119	1
								126		1
								133		1
NOTE: * This mouse (6143904) turned out to be WT so it was removed from the analysis

## Sheet: Fig 2 Survival
Survival Female				Survival Male				Survival Female + Male
Female RSV	Female NC			Male RSV	Male NC			Female + Male RSV	Female + Male NC
113	114			113	110			113	114
122	122			113	113			122	122
123	125			113	113			123	125
123	125			113	114			123	125
124	126			117	114			124	126
128	128			121	122			128	128
129	135			123	127			129	135
135	136			128	128			135	136
143	142			132	131			143	142
					138
								113	110
								113	113
								113	113
								113	114
								117	114
								121	122
								123	127
								128	128
								132	131
									138
Survival Female				Survival Male				Survival Female + Male
day	F rsv	F nc		day	M rsv	M nc		day	F+M rsv	F+M nc
113	1			109				113	1
114		1		110		1		114		1
122	1	1		113	1	1		122	1	1
123	1			113	1	1		123	1
123	1			113	1			123	1
124	1			113	1			124	1
125		1		114		1		125		1
125		1		114		1		125		1
126		1		117	1			126		1
128	1	1		121	1			128	1	1
129	1			122		1		129	1
135	1	1		123	1			135	1	1
136		1		127		1		136		1
142		1		128	1	1		142		1
143	1			131		1		143	1
				132	1
				138		1		109
								110		1
								113	1	1
								113	1	1
								113	1
								113	1
								114		1
								114		1
								117	1
								121	1
								122		1
								123	1
								127		1
								128	1	1
								131		1
								132	1
								138		1

## Sheet: Fig 3 Body Mass
Body Mass (g) Female
Age (weeks)	ALSFrsv										ALSFnc										WTFarfchow
	6143901	6143902	6143903	6143904	6143905	6143781	6143782	6143783	6143784	6143785	6143771	6143772	61143773	6143774	6143775	6143791	6143792	6143793	6143794		6143991	6143992	6143993	6143994	6143995
6	22.2	17.9	19.5	20*	18.6	17.7	21.5	18.1	21.5	20.5	17.8	18.2	17.8	16.6	17.4	19.6	16.1	21.4	18.8		20	19.7	20.8	18.7	20.3
8	22.77	19.07	19.69	22.59*	19.51	18.08	23.21	18.96	21.65	22.03	19.02	18.9	19.57	18.37	17.85	19.65	17.24	24.05	19.77		21.2	21.89	23.06	20.95	22.98
9	23.07	20.85	19.93	21.79*	20.19	18.3	23.48	19.78	21.19	22.25	18.6	19.5	18.61	17.9	18.22	19.22	17.14	23.58	19.99		22.5	20.45	22.92	19.69	22.13
10	24.48	20.77	20.75	23.68*	22.14	19.34	24.31	20.82	22.93	22.89	20.16	20.4	20.13	18.7	17.51	21.02	17.59	23.41	20.44		22.19	22.19	22.43	19.86	22.93
11	24.55	20.31	20.63	23.1*	21.81	19.07	24.98	20.71	22.86	22.26	18.58	19.95	19.32	18.54	17.67	20.33	17.89	23.25	20.42		23.18	22.15	23.55	20.98	23.94
12	25.59	22.42	22.08	26.97*	23.95	20.72	25.91	21.61	23.38	23.01	19.69	20.99	20.2	19.73	18.86	21.71	18.68	26.12	20.99		23.63	23.11	23.53	22.47	23.87
13	25.1	22.66	22.29	27.09*	23.8	21.01	26.67	22.65	23.32	22.94	19.86	20.91	20.84	19.25	17.51	21.73	18.96	23.06	21.82		23.29	23.65	23.32	21.47	24.7
14	25.21	23.01	22.19	26.74*	24.89	22.72	27.26	22.37	24.51	23.13	20.06	20.99	21.22	19.65	17.95	22.42	19.02	25.81	21.51		24.77	23.86	24.79	23.02	23.69
15	24.94	22.87	22.08	29.4*	25.42	22.13	27.82	23.14	23.4	22.55	19.26	21.05	20.65	19.64	17.5	22.26	19.97	24.04	20.55		25.8	23.42	26.5	22.31	24.54
15.4	23.95	24.59	22.37	28.86*	24.23	21.28	27.09	22.06	22.53	21.96	19.5	20.8	19.71	20.02	17.47	22.35	18.45	21.73	19.74
15.6	23.22	24.24	21.58	27.93*	24.53	20.95	27.63	22.32	22.83	21.99	20.04	21.68	20.56	20.28	17.94	22.42	19.68	21.8	19.72
16	21.49	22.4	20.07	29.37*	24.12	21.8	28.21	23.21	20.96	23.59	19.35	20.5	20.08	20.06	18.23	22.5	18.91	21.57	18.82		24.07	25.03	24.49	21.72	27.87
16.5	19.52	22.98	20.04	28.98*	23.58	19.89	26.05	20.73	22.22	20.22	19.19	21.31	19.59	20.08	19.01	21.33	19.31	22.19	19		23.86	23.71	26.61	22.63	26.83
17		22.85	18.54	27.75*	22.54	19.66	26.44	20.37	21.78	18.73	18.37	20.46	18.93	19.01	18.21	20.55	19.59	22.99			26.34	24.77	29.97	26.28	26.33
17.5		22.48	17.64	28.94*	22.6	19.4	26.21	19.01	20.41	18.18	17.91	21.12	18.29	18.42	17.33	20.1	19.82	22.65			27.42	25.52	26.78	22.84	28.74
18		23.14	16.86	29.02*	20.47	18.96	26.17	17.98	19.25	18.04	16.36	20.15	16.58	17.04	17.29	18.44	18.68	21.09			25.66	25.46	28.21	22.36	30.25
18.5		23.2		29.83*	19.8	18.22	25.36	17.25				20.1	15.95	15.86	16.75	17.45	19.12	20.06			25.19	25.78	28.53	22.87	28.18
19		22.19		30.38*		17.44	24.58					19.4			16.98		18.97				27.1	26.24	26.93	22.76	27.49
19.5		22.44		29.18*		16.6	24.69					18.65			16.45		18.44				28.49	25.32	27.89	23.73	28.87
20		21.3		30.06*		15.8	22.7					17.5			15.84		18.34				25.71	25.83	28.86	23.77	31.03
20.5		20.66		29.79*			21.18										18.05				26.95	26.4	30.62	23.47	29.43
21				29.47*			20.44
NOTE: 6143904 turned out to be WT
Body Mass (g) Male
Age (weeks)	ALSMrsv										ALSMnc										WTMarfchow
	6231881	6143922	6171371	6143924	6143925	6173831	6143971	6227901	6180711	6227891	6179251	6143952	6143953	6171381	6179261	6143931	6143932	6143941	6143934	6160771	6234341	6143892	6143893	6234741	6180721
7	23.8	23.46	24.26	24.45	24.88	25.3	22.13	24.3	23.54	25.31	22.48	23.2	22.59	22.39	22.76	23.99	24.12	22.2	25.83	26.7	25.09	26.75	25.11	28.88	25.22
8	24.46	24.8	25.65	24.91	26.62	26.16	22.43	24.62	23.9	25.95	23.83	24.82	24.58	23.83	24.19	25.38	25.6	23.39	27.26	26.93	25.06	27.41	26.95	28.9	26.15
9	25.05	25.12	24.44	24.88	27.02	28.06	22.87	24.71	25.19	26.2	24.85	25.82	25.28	24.34	25.19	26.64	25.79	25.24	28.25	28.24	26.44	28.18	27.85	29.83	27.26
10	26.64	26.88	26.29	26.77	29.2	28.51	26.14	26.62	26.54	27.02	25.95	28.47	27.14	25.73	26.8	27.96	25.77	26.34	29.72	29.25	27.64	29.25	29.56	30.23	27.5
11	26.74	26.6	26.23	26.34	29.65	28.75	26.42	26.26	26.54	28.08	26.69	28.81	28.34	26.16	28.07	28.86	26.05	26.55	30.86	28.88	27.85	30.21	31.04	32.24	28.31
12	27.2	26.8	26.92	26.92	29.4	30.1	26.67	26.64	27.71	28.29	27.63	28.86	28.2	26.49	27.7	29.04	26.49	27.16	31.26	30.32	28.66	30.29	30.85	32.19	28.12
13	26.72	27.26	27.12	27.12	27.19	30.98	27.14	26.91	28.3	28.08	28.77	29.5	28.71	27.45	28.77	29.02	26.02	27.55	31.98	31.85	28.9	31.09	31.61	33.54	28.92
14	27.36	27.58	26.66	27.11	29.18	30.61	26.16	26.2	28.08	27.56	27.77	28.8	27.17	27.2	27.77	28.63	24.14	27.73	31.57	30.91	28.96	30.43	30.53	33.52	28.79
15	26.83	27.1	27.7	27.43	28.58	29.78		26.56	28.28	27.9	27.93	28.5	27.71	27.49	27.93	27.98	24.37	28.18	31.92	29.79	30	31.06	31.79	34.86	29.37
15.4	25.95	26.14	27.24	28.58	27.76	28.41		26.6	28.19	27.33	27	26.62	26.1	25.65	26.31	26.3	23	27.63	29.6	29.31
15.6	25.66	25.88	26.62	26.51	27.46	28.69		26.24	28.18	27.08	27.32	27.7	26.42	26.42	25.75	26.63	23.48	27.54	30.26	29.31
16	25.35	24.53	25.39	25.55	26.3	27.91		26.32	27.4	25.78	26.69	26.13	25.59	25.54	24.4	24.7		26.43	30.12	29.23	29.74	30.76	31.05	34.93	29.42
16.5	23.8	22.86	27.7	25.11	25.44	28.59		25.85	27.4	25.48	26.87	25.53	24.88	25.46	23.26	23.77		26.3	29.51	28.61	30.35	31.62	31.73	36.43	29.78
17	23.09		24.3			27.13		24.91	27.17		26.3			24.23				24.94	28.32	28.63	30	30.97	30.57	36.64	29.98
17.5			22.97			26		24.37	26.5		26.49			23.91				24.81	28.21	28.38	29.97	32.95	31.95	36.97	30.2
18			22.93			24.9		23.26	25.85		25.79			22.46				23.26	26.3	27.41	30.5	31.36	31.88	36.78	30.16
18.5								24.82	22.6		25.72			22.92					26.41	26.21	30.66	33.29	32.66	37.64	31.36
19									23.02		24.95									20.71	30.9	33.59	32.34	37.23	31.24
19.5											24.78										30.54	34.36	33.03	37.27	30.87
20											23.84										30.55	34.31	34.97	37.31	31.21
20.5																					30.6	33.23	34.84	37.39	31.38

## Sheet: Fig 3 CMAP
CMAP (mV) Female
Age (weeks)	ALSFrsv										ALSFnc										WTFarfchow
	6143901	6143902	6143903	6143904	6143905	6143781	6143782	6143783	6143784	6143785	6143771	6143772	6143773	6143774	6143775	6143791	6143792	6143793	6143794		6143991	6143992	6143993	6143994	6143995
6	81.6	73.6	71.6	79.5*	80.4	76.8	71.8	67.2	78.8	78.4	86.9	75.1	73.8	80.9	79.7	78.1	74.8	77	83.6		84.9	86.2	80.6	79.4	84.1
10	55.5	30.3	75.7	85.8*	68	65.8	44.9	30.4	58.6	62.3	90.1	75.6	58.5	73.4	34.9	83.8	52.6	31.5	70		92.7	72.1	84.3	86.9	85.8
12	51.7	50.1	72.3	72.6*	63.7	50.2	31.2	12.4	58.3	43	69.4	38.1	36.7	79.9	23.2	68.3	48.2	17.5	55.4		83.2	64.7	65.1	83.9	73.6
14	63.5	53.4	53.6	84.8*	81.1	78.4	30	36	66.7	27.3	87.7	74.7	10.1	79.5	18.1	73.9	39.9	14.6	34.9		97.5	94.1	92.5	95.3	94.4
16	29.1	36.5	25.3	79.3*	67.9	60.5	20.4	31.8	56.3	19.4	43.3	65	19.7	72.5	9.9	57	40.7	9	21.7		79.7	83.5	70.7	69.1	85.2
18		21.7		85.7*	38.6	47.5	29.5	29.3	31.4			44.9	8.2	55.5	13	38.9	32.6	11.7			85.6	92.1	82.3	79	87.7
20		9.2		51*			24										21.4				91.7	89.5	61.3	85.6	71.4
21				82.5*													17.5
NOTE: 6143904 turned out to be WT
CMAP (mV) Male
Age (weeks)	ALSMrsv										ALSMnc										WTMarfchow
	6231881	6143922	6171371	6143924	6143925	6173831	6143971	6227901	6180711	6227891	6179251	6143952	6143953	6171381	6179261	6143931	6143932	6143941	6143934	6160771	6234341	6143892	6143893	6234741	6180721
7	84.2	73.9	67	64.1	72.7	79.9	88.7	75	92	82	56	79.2	67	69.6	87.1	82.1	63.5	64.3	87.3	85.7	66.1	76.6	71.7	68.7	71.4
11	42.8	32.7	50.9	80.9	73	27.2	67.2	36.7	14.2	63.2	55	55.9	72.3	76.8	34	70.2	35.4	44.3	68.9	77.8	85.9	63	72.7	73.9	84.3
13	37.1	23.6	72.7	64.4	39.9	23.8	51.5	47.9	46.2	52.3	47.6	77.4	58.1	52.6	46.3	54.4	32.6	63	65	54.5	73.6	84.1	55.5	69.9	78.5
15	21	14.4	42.1	33.7		21.3	11.6	36.4	44.1	44.8	24.3	22.2	10.4	6.4	40.6	37.6	38.1	40.8	47.1	15.5	82.6	82.8	61	57.7	91.2
17	16.9		23.5			16.8		14.5	25.4		44.5			17				16.4	22.8	25.9	76	74.1	66.9	75.1	63.6
19									13.4		21.1										75.2	83.1	73.5	96	71.5

## Sheet: Fig 3 LP50 kHz 
LP50 kHz (degrees) Female
Age (weeks)	ALS_F Resveratrol										ALS_F Untreated										WTF
	6143901	6143902	6143903	6143904	6143905	6143781	6143782	6143783	6143784	6143785	6143771	6143772	6143773	6143774	6143775	6143791	6143792	6143793	6143794		6143991	6143992	6143993	6143994	6143995
6	22.7622	23.5459	21.7315	25.12620446*	19.9558	20.6119	18.7714	24.6743	21.0027	22.3202	20.1523	21.6153	22.1037	22.2654	22.4063	21.1688	22.0995	23.5181	32.35162382*		31.041	16.7948	21.8597	20.7752	25.484
10	22.6962	28.4028	17.7669	25.99445301*	29.442	28.5966	19.6718	19.6718	32.98291525*	25.1445	23.68235269*	28.1165	28.6868	20.856	20.4961	22.8113	22.2848	23.3463	22.5709		21.50792119*	27.5901	22.6415	20.985	25.6066
12	16.3647	17.2532	17.2532	19.1587582*	23.0407	15.3147	14.55504615*	22.1531	17.8343	17.8343	32.81460363*	26.9598	31.18719172*	22.9391	31.59681174*	16.9337	23.5878	15.8667	20.5626		17.3649	26.892	18.0234	17.4138	21.2338
14	17.4043	19.0672	14.0634	21.83916089*	17.66165699*	12.7521	14.8992	15.0102	18.3305	29.8252	27.3365	23.6082	13.6228	16.8711	16.2456	13.8681	19.34080449*	14.517	20.8411		20.8736	25.8437	18.602	21.6784	21.07107033*
16	19.6729	14.38088367*	15.8365	17.9902808*	19.6048	15.068	16.503013*	20.2678	18.7269	21.5501	17.5582	19.0909	15.5701	16.6221	21.12664074*	18.1942	18.4034	12.8723	21.9006		25.4214	26.9566	26.0293	21.7435	24.9051
18		20.7414		20.17260689*	20.0946	18.0414	16.85648742*	20.13	19.1783			20.6572	12.1085	18.9235	14.4348	16.9635	14.49708971*	11.9374			30.45424207*	26.2854	28.2421	25.5116	23.6821
20
22
NOTE: 6143904 turned out to be WT
LP50 kHz (degrees) Male
Age (weeks0	ALS_M Resveratrol										ALS_M Untreated										WT M
	6231881	6143922	6143924	6143925	6143972	6227901	6227891	6171371	6173831	6180711	6143952	6143953	6143931	6143932	6143934	6143941	6160771	6171381	6179251	6179261	6143891	6143892	6143893	6143894	6180721
8	28.9211	21.4712	23.7967	26.3727	31.17032415*	28.9593	24.5349	23.4091	22.2742	26.2117	25.7176	22.0589	25.0828	22.8057	24.6287	30.1608	26.0177	26.4599	25.7997	27.9879	27.4062	23.5501	20.3792	20.35800052*	26.2117
11	20.4655	21.0467	22.7519	18.1969	22.37855919*	18.8333	27.4513	22.7283	23.668	25.7312	25.7312	29.2983	28.4079	22.8561	16.86942167*	18.784	25.7855	23.668	23.1892527*	16.6218	33.3059	23.3268	20.05198673*	25.23065952*	25.3456
13	15.5906	15.1953	21.0606	17.4263	20.48040999*	12.233	30.9379	21.2971	15.0475	15.4109	21.0994	22.1706	22.3224	21.0461	16.5961	19.3356	17.29744655*	15.0475	15.00711032*	19.7873	22.4678	23.8936	31.59990756*	21.8163	15.085
15	18.9795	16.1992	19.7771	15.9003		18.7639	24.3856	19.7318	18.3468	24.1113	21.7245	19.9043	21.0171	20.5693	15.0916	15.0916	18.57072599*	19.0676	26.3249	22.352	26.519	20.64246455*	23.83995008*	17.89413398*	16.4921
17	14.6831					19.1572		14.9591	22.96913216*	16.3379					19.14125779*	20.0794	22.4261	19.3925	22.4755		26.5526	22.7376	23.84182136*	20.674	25.8868
19										22.23883029*									19.40884947*		17.7009	27.1399	22.47989593*	25.4339	21.1782
21
Mean LP50 kHz Female
Age (weeks)	ALSF rsv			ALSF nc			WT F
	Mean	SEM	N	Mean	SEM	N	Mean	SEM	N
6	22.12	0.5826	22	22.12	0.5826	22	22.12	0.5826	22
10	23.92	1.633	8	23.65	1.093	8	24.21	1.479	4
12	18.38	0.9687	8	21.14	1.722	6	24.06	2.829	2
14	17.67	1.9	8	18.36	1.785	8	22.8	1.54	3
16	18.68	0.8962	7	17.53	0.9364	8	25.01	0.8854	5
18	19.64	0.4705	5	15.84	1.473	6	25.93	0.9443	4
Mean LP50 kHz Male
Age (weeks)	ALSM RSV			ALSM NC			WT M
	Mean	SEM	N	Mean	SEM	N	Mean	SEM	N
8	25.23	0.529	23	25.23	0.529	23	25.23	0.529	23
11	22.33	0.909	10	23.89	1.562	8	25.45	2.184	5
13	17.86	2.067	8	19.68	0.9274	8	22.73	0.6134	3
15	19.58	0.9945	9	20.13	1.171	9	23.67	1.7	3
17	19.49	1.921	3	20.26	0.7488	4	23.96	1.376	4
19	22.24	0	1	19.41	0	1	22.86	2.129	2

## Sheet: Fig 3 PGE
PGE (sec) Female
Age (weeks)	ALSFrsv										ALSFnc										WTFarfchow
	6143901	6143902	6143903	6143904	6143905	6143781	6143782	6143783	6143784	6143785	6143771	6143772	6143773	6143774	6143775	6143791	6143792	6143793	6143794		6143991	6143992	6143993	6143994	6143995
6	120	120	120	120*	120	120	120	120	120	120	120	120	120	120	120	120	120	120	120		120	120	120	120	120
10	120	120	120	120*	120	120	33	66	120	120	120	120	120	120	120	120	120	65	120		120	120	120	120	120
12	104	56	120	93*	120	120	23	60	120	120	120	120	106	120	70	120	120	16	120		120	120	120	120	120
14	73	63	120	120*	80	120	29	82	120	92	120	120	73	120	43	120	120	7	120		120	120	120	120	120
16	3	47	107	120*	91	120	31	41	50	43	120	120	17	120	9	120	25	0	120		120	120	120	120	120
18		16		120*	10	49	3	0	9			35	0	0	6	0	14	0			120	120	120	120	120
20		0		120*			1										0				120	120	120	120	120
NOTE: 6143904 turned out to be WT
PGE (sec) Male
Age (weeks)	ALSMrsv										ALSMnc										WTMarfchow
	6231881	6142922	6171371	6143924	6143925	6173831	6143971	6227901	6180711	6227891	6179251	6143952	6413953	6171381	6179261	6143931	6143932	6143941	6143934	6160771	6234341	6143892	6143893	6234741	6180721
7	120	120	120	120	120	120	120	120	120	120	120	120	120	120	120	120	120	120	120	120	120	120	120	120	120
11	93	83	120	120	120	87	120	120	120	120	114	120	88	10*	88	120	108	99	120	102	120	51*	120	94	76*
13	56	75	68	120	120	25	110	120	120	120	120	120	76	7*	62	120	73	66	120	120	120	120	120	88	120
15	35	20	81	58		33	51	120	120	120	85	73	2	0*	89	120	81	42	120	120	120	120	120	69	55*
17	17		9			37		12	45		80			28*				47	23	37	120	64*	120	48*	83
19									0		19										120	120	105	102	99

## Sheet: Fig 3 MS
Motor Score Female
Age (weeks)	ALSFrsv										ALSFnc										WTFarfchow
	6143901	6143902	6143903	6143904	6143905	6143781	6143782	6143783	6143784	6143785	6143771	6143772	6143773	6143774	6143775	6143791	6143792	6143793	6143794		6143991	6143992	6143993	6143994	6143995
6	4	4	4	4*	4	4	4	4	4	4	4	4	4	4	4	4	4	4	4		4	4	4	4	4
10	4	4	4	4*	4	4	4	4	4	4	4	4	4	4	4	4	4	4	4		4	4	4	4	4
12	4	4	4	4*	4	4	4	4	4	4	4	4	4	4	4	4	4	4	4		4	4	4	4	4
14	4	4	4	4*	4	4	4	4	4	4	4	4	4	4	4	4	4	4	4		4	4	4	4	4
15	3	4	4	4*	4	4	4	4	4	3.5	4	4	4	4	4	4	4	4	4
16	2	4	3	4*	3	4	4	3	3	3	4	4	3	3	4	4	4	3	3		4	4	4	4	4
16.5	1	4	3	4*	3	4	3	3	3	2.5	3	4	3	3	3	3	4	3	2		4	4	4	4	4
17	0	4	3	4*	3	4	3	3	3	2	3	4	3	3	3	3	3	3	0		4	4	4	4	4
17.5	0	4	1	4*	3	3	3	3	3	2	3	3	3	3	3	3	3	3	0
18	0	4	0	4*	3	3	3	2	3	0	0	3	2	2	3	3	3	3	0		4	4	4	4	4
18.5	0	4	0	4*	2	3	3	2	0	0	0	3	0	0	3	2	3	2	0		4	4	4	4	4
19	0	3	0	4*	1	3	3	1	0	0	0	2	0	0	2	1	3	1	0		4	4	4	4	4
19.5	0	3	0	4*	0	1	3	0	0	0	0	1	0	0	2	0	3	0	0		4	4	4	4	4
20	0	2	0	4*	0	0	3	0	0	0	0	0	0	0	0	0	3	0	0		4	4	4	4	4
20.5	0	2	0	4*	0	0	3	0	0	0	0	0	0	0	0	0	3	0	0		4	4	4	4	4
21				4*			0
NOTE: 6143904 turned out to be WT
Motor Score Male
Age (weeks)	ALSMrsv										ALSMnc										WTMarfchow
	6231881	6143922	6171371	6143924	6143925	6173831	6143971	6227901	6180711	6227891	6179251	6143952	6143953	6171381	6179261	6143931	6143932	6143940	6143934	6160771	6234341	6143892	6143893	6234741	6180721
7	4	4	4	4	4	4	4	4	4	4	4	4	4	4	4	4	4	4	4	4	4	4	4	4	4
11	4	4	4	4	4	4	4	4	4	4	4	4	4	4	4	4	4	4	4	4	4	4	4	4	4
13	4	4	4	4	4	4	4	4	4	4	4	4	4	4	4	4	4	4	4	4	4	4	4	4	4
15	3	3	4	3	3	4	4	4	4	4	4	3	3	3	3	3	3	4	4	4	4	4	4	4	4
16	3	2	3	2	2	3		3	4	3	4	3	3	3	2	2		3	3	4	4	4	4	4	4
16.5	3	0	3	2	1	3		3	4	3	4	3	2	3	2	1		3	3	4	4	4	4	4	4
17	2	0	2	0	0	3		3	3	0	4	0	0	3	0	0		3	3	4	4	4	4	4	4
17.5	0	0	1	0	0	3		2	3	0	4	0	0	3	0	0		2	3	4	4	4	4	4	4
18	0	0	0	0	0	0		2	3	0	4	0	0	1	0	0		0	2	3	4	4	4	4	4
18.5	0	0	0	0	0	0		2	3	0	4	0	0	1	0	0		0	1	3	4	4	4	4	4
19	0	0	0	0	0	0		0	1	0	3	0	0	0	0	0		0	0	2	4	4	4	4	4
19.5	0	0	0	0	0	0		0	0	0	1									0
20											0										4	4	4	4	4

## Sheet: Fig 4
CMAP (mV)									LP 50 kHz degrees
	ALS RSV+NC Mean			Baseline						ALS RSV+NC Mean			BASELINE
Age (weeks)	Mean	SEM	N	Mean	SEM	N			Age (weeks)	Mean	SEM	N	Mean	SEM	N
6	77.35	1.067	19	77	1.1	39			6	25	0.3809	18	25	0	37
8	76.07	2.284	20	77	1.1	39			8	25.4	0.5642	19	25	0	37
10	60.41	4.365	19	77	1.1	39			10	23.92	0.9018	17	25	0	37
11	53.97	4.378	20	77	1.1	39			11	23.02	0.8517	18	25	0	37
12	49.59	4.463	19	77	1.1	39			12	19.54	0.8938	15	25	0	37
13	50.55	3.234	20	77	1.1	39			13	18.77	1.119	16	25	0	37
14	53.06	5.941	19	77	1.1	39			14	18.24	1.207	17	25	0	37
15	29.07	3.074	19	77	1.1	39			15	19.85	0.7483	18	25	0	37
16	40.28	5.08	19	77	1.1	39			16	18.06	0.6047	16	25	0	37
17	22.37	2.789	10	77	1.1	39			17	19.93	0.8438	7	25	0	37
18	34.89	5.384	14	77	1.1	39			18	17.78	0.934	12	25	0	37
19	17.25	3.85	2	77	1.1	39
PGE (sec)
									Motor Score
	ALS RSV+NC Mean			BASELINE						ALS RSV+NC Mean			BASELINE
Age (weeks)	Mean	SEM	N	Mean	SEM	N			Age (weeks)	Mean	SEM	N	Mean	SEM	N
6	120	0	18	120	0	37			6	4	0	18	4	0	37
8	120	0	20	120	0	37			8	4	0	19	4	0	37
10	109.1	6.097	18	120	0	37			10	4	0	18	4	0	37
11	108.5	3.28	19	120	0	37			11	4	0	19	4	0	37
12	97.5	8.433	18	120	0	37			12	4	0	18	4	0	37
13	95.32	7.008	19	120	0	37			13	4	0	19	4	0	37
14	90.11	8.555	18	120	0	37			14	4	0	18	4	0	37
15	76.11	9.248	18	120	0	37			15	3.586	0.09308	29	4	0	37
16	65.78	11.21	18	120	0	37			16	3	0.1307	27	4	0	37
17	34.11	7.4	9	120	0	37			16.5	2.685	0.1909	27	4	0	37
18	10.92	4.201	13	120	0	37			17	2.037	0.2995	27	4	0	37
19	9.5	9.5	2	120	0	37			17.5	1.741	0.2952	27	4	0	37
									18	1.222	0.2891	27	4	0	37
									18.5	1.037	0.2747	27	4	0	37
									19	0.6296	0.2145	27	4	0	37

## Sheet: Fig 5
	Mouse ID	Lifespan (days)	Rate deterioration LP50	Rate deterioration PGE	Rate deterioration CMAP	Rate deterioration Motor Score
ALSFrsv	6143901	113	0.4883	10.71	4.132	0.7719
	6143902	143	0.4437	8.907	3.174	0.1454
	6143903	123	0.6721	0.9662	4.277	1.173
	6143904 not ALS; really is WTF
	6143905	129	0.2685	7.893	2.351	0.5714
	6143781	135	0.6475	4.057	1.729	0.3409
	6143782	144	0.484	7.986	3.791	0.2707
	6143783	128	0.3942	8.25	2.433	0.6366
	6143784	123	0.1588	8.843	2.961	0.9273
	6143785	122	-0.1404	6.858	6.261	1.018
ALSFnc	6143771	122	-0.07129		3.413	1.218
	6143772	135	0.3404	4.857	1.842	0.4862
	6143773	125	1.094	11.11	5.889	0.9925
	6143774	125	0.4341	6.857	1.55	0.9925
	6143775	135	0.7041	11.22	5.501	0.416
	6143791	126	0.4675	6.857	3.146	0.6667
	6143792	142	0.3303	9.45	3.304	0.3258
	6143793	128	1.111	10.44	5.326	0.5714
	6143794	114	0.08663		6.398	1.098
ALSMrsv	6231881	117	1.445	10.8	6.764	0.796
	6143922	113	0.7901	11.4	7.517	0.7663
	6171371	121	0.4597	10.18	3.769	0.8297
	6143924	113	0.5043	6.2	3.267	0.7822
	6143925	113	1.314		4.675	0.7743
	6173831	123	0.1941	9.446	6.02	0.7644
	6143971 sac'd wk 8			7.329	8.997
	6227901	128	0.9812	8.027	5.209	0.5743
	6180711	132	0.5188	9.536	5.004	0.3901
	6227891	113	-0.2178		4.724	0.8772
ALSMnc	6179251	138	0.4471	7.529	2.769	0.07327
	6143952	114	0.5974	4.7	5.444	0.8158
	6143953	114	0.3141	13.23	6.117	0.8079
	6171381	128	0.8266		6.781	0.5941
	6179261	113	0.7527	5.129	5.64	0.7822
	6143931	113	0.5724		5.467	0.7743
	6143932	110	0.2998	5.743	3.463	0.5
	6143941	122	1.126	8.385	3.981	0.7921
	6143934	127	0.7326	7.209	6.077	0.6099
	6160771	131	0.375	5.682	7.288	0.2713
		Spearman r
		r	-0.01966	-0.04174	-0.3224	-0.6615
		95% confidence interval	-0.3502 to 0.3153	-0.3996 to 0.3271	-0.5917 to 0.01179	-0.8149 to -0.4214
		P value
		P (two-tailed)	0.9081	0.8236	0.0517	<0.0001
		P value summary	ns	ns	ns	****
		Exact or approximate P value?	Approximate	Approximate	Approximate	Approximate
		Significant? (alpha = 0.05)	No	No	No	Yes
		Number of XY Pairs	37	31	37	37

## Sheet: Fig 6
Correlation of CMAP (mV) with LP50 kHz (degrees) with errors														CMAP (mV) vs LP50 F+M
CMAP (mV)		LP50 F+M			LP50 F			LP50 M					Spearman r
X	error bar	Mean	SEM	N	Mean	SEM	N	Mean	SEM	N			r	0.6273
77.35	1.067	25	0.3809	18	25	0.3809	18						95% confidence interval	0.02346 to 0.8958
76.07	2.284	25.4	0.5642	19				25.4	0.5642	19
60.41	4.365	23.92	0.9018	17	23.92	0.9018	17						P value
53.97	4.378	23.02	0.8517	18				23.02	0.8517	18			P (two-tailed)	0.044
49.59	4.463	19.54	0.8938	15	19.54	0.8938	15						P value summary	*
50.55	3.234	18.77	1.119	16				18.77	1.119	16			Exact or approximate P value?	Exact
53.06	5.941	18.24	1.207	17	18.24	1.207	17						Significant? (alpha = 0.05)	Yes
29.07	3.074	19.85	0.7483	18				19.85	0.7483	18
40.28	5.08	18.06	0.6047	16	18.06	0.6047	16						Number of XY Pairs	11
22.37	2.789	19.93	0.8438	7				19.93	0.8438	7
34.89	5.384	17.78	0.934	12	17.78	0.934	12
Correlation of PGE (sec) with LP 50 kHz (degrees) with errors														PGE (sec) vs LP50 F+M
PGE		LP50 F+M			LP50 F			LP50 M					Spearman r
X	error bar	Mean	SEM	N	Mean	SEM	N	Mean	SEM	N			r	0.8064
120	0*	25	0.3809	18	25	0.3809	18						95% confidence interval	0.3826 to 0.9498
120	0	25.4	0.5642	19				25.4	0.5642	19
109.1	6.097	23.92	0.9018	17	23.92	0.9018	17						P value
108.5	3.28	23.02	0.8517	18				23.02	0.8517	18			P (two-tailed)	0.0041
97.5	8.433	19.54	0.8938	15	19.54	0.8938	15						P value summary	**
95.32	7.008	18.77	1.119	16				18.77	1.119	16			Exact or approximate P value?	Exact
90.11	8.555	18.24	1.207	17	18.24	1.207	17						Significant? (alpha = 0.05)	Yes
76.11	9.248	19.85	0.7483	18				19.85	0.7483	18
65.78	11.21	18.06	0.6047	16	18.06	0.6047	16						Number of XY Pairs	11
34.11	7.4	19.93	0.8438	7				19.93	0.8438	7
10.92	4.201	17.78	0.934	12	17.78	0.934	12

[truncated: 1 more sheets: Fig 7]
